# Supplementary material for: Selenylated indoles: synthesis, effects on lipid membrane properties and DNA cleavage
Source: Royal Society of Chemistry journal article supplement (doi:10.1039/d2nj04330k), 2022-12-13
Supplement: d2nj04330k1.pdf [file d2nj04330k1.pdf]

## SUPPLEMENTARY MATERIAL

### Selenylated indoles: synthesis, effects on lipid membranes properties and interaction with DNA

Gabriela J. Pedroso,<sup>a</sup> Desirée M. S. Costa,<sup>b</sup> Lucas T. Felipe Kokuszi,<sup>b</sup> Eduardo B. V. da Silva,<sup>b</sup> Marcos F. O. Cavalcante,<sup>c</sup> Eduardo Junca,<sup>d</sup> Cassio A. O. Moraes,<sup>e</sup> Claus T. Pich,<sup>a</sup> Vânia R. de Lima,<sup>b</sup> Sumbal Saba,<sup>c</sup> Jamal Rafique,<sup>c,e,\*</sup> Tiago E. A. Frizon<sup>a\*</sup>

<sup>a</sup> Department of Energy and Sustainability, Federal University of Santa Catarina, Araranguá, SC, Brazil. E-mail: [tiago.frizon@ufsc.br](mailto:tiago.frizon@ufsc.br)

<sup>b</sup> Escola de Química e Alimentos, Programa de Pós-Graduação em Química Tecnológica e Ambiental, Universidade Federal do Rio Grande, RS, Brazil.

<sup>c</sup> Instituto de Química, Universidade Federal de Goiás, Goiânia, 74690-900, GO-Brazil.

<sup>d</sup> University of the Extreme South of Santa Catarina (UNESC), Criciúma, SC, Brazil

<sup>e</sup> Institute of Chemistry, Federal University of Mato Grosso do Sul, Campo Grande, 79074-460, MS-Brazil. [jamal.rafique@ufms.br](mailto:jamal.rafique@ufms.br) , [jamal.chm@gmail.com](mailto:jamal.chm@gmail.com)

\*E-mail: [tiago.frizon@ufsc.br](mailto:tiago.frizon@ufsc.br) , [jamal.rafique@ufms.br](mailto:jamal.rafique@ufms.br)

### TABLE OF CONTENTS

|                              |       |   |
|------------------------------|-------|---|
| 1. Infrared characterization | ..... | 2 |
| 2. NMR characterization      | ..... | 3 |

**Table ESI1.** Wavenumber values (cm<sup>-1</sup>) of HATR-FTIR peaks related to specific groups of asolectin liposomes (ASO) in the presence of selenylated indoles (**3a-d**).

|                                             | ASO     | 3a      | Δ     | 3b      | Δ     | 3c      | Δ      | 3d      | Δ     |
|---------------------------------------------|---------|---------|-------|---------|-------|---------|--------|---------|-------|
| $\nu_{\text{as}} \text{N}^+(\text{CH}_3)_3$ | 979.84  | 981.17  | 1.93  | 979.84  | -     | 975.56  | -4.28  | 979.84  | -     |
| $\nu_{\text{as}} \text{PO}_2^-$             | 1219.01 | 1219.01 | -     | 1219.01 | -     | 1219.01 | -      | 1219.01 | -     |
| $\nu_{\text{s}} \text{PO}_2^-$              | 1082.07 | 1093.64 | 11.57 | 1074.35 | -7.72 | 1070.49 | -11.58 | 1078.21 | -3.86 |
| $\nu \text{C}=\text{O}$                     | 1734.01 | 1734.01 | -     | 1734.01 | -     | 1734.01 | -      | 1732.08 | -1.93 |
| $\nu \text{C}-\text{O}-\text{C}$            | 1077.09 | 1075.47 | 1.69  | 1074.44 | 2.65  | 1074.57 | 2.52   | 1074.70 | 2.39  |
| $\nu_{\text{as}} \text{CH}_2$               | 2924.09 | 2924.09 | -     | 2924.09 | -     | 2924.09 | -      | 2924.09 | -     |
| $\nu_{\text{s}} \text{CH}_2$                | 2852.72 | 2852.72 | -     | 2854.65 | 1.93  | 2852.72 | -      | 2852.72 | -     |

**Table ESI2.** Bandwidth values (cm<sup>-1</sup>) of HATR-FTIR peaks related to specific groups of asolectin liposomes (ASO) in the presence of selenylated indoles (**3a-d**).

|                                             | ASO   | 3a    | Δ     | 3b    | Δ      | 3c    | Δ     | 3d    | Δ     |
|---------------------------------------------|-------|-------|-------|-------|--------|-------|-------|-------|-------|
| $\nu_{\text{as}} \text{N}^+(\text{CH}_3)_3$ | 2.64  | 3.09  | 0.45  | 5.17  | 2.53   | 7.93  | 5.29  | 10.47 | 7.83  |
| $\nu_{\text{as}} \text{PO}_2^-$             | 7.55  | 7.80  | 0.25  | 8.05  | 0.5    | 7.80  | 0.25  | 7.55  | -     |
| $\nu_{\text{s}} \text{PO}_2^-$              | 33.56 | 44.43 | 10.87 | 41.16 | 7.6    | 40.27 | 6.71  | 39.32 | 5.76  |
| $\nu \text{C}=\text{O}$                     | 25.04 | 23.87 | -1.17 | 31.31 | 6.27   | 33.65 | 8.61  | 31.7  | 6.66  |
| $\nu \text{C}-\text{O}-\text{C}$            | 12.79 | 4.52  | -8.27 | 2.54  | -10.25 | 10.75 | -2.04 | 6.73  | -6.06 |
| $\nu_{\text{as}} \text{CH}_2$               | 18.46 | 17.72 | -0.74 | 19.19 | 0.73   | 15.51 | -2.95 | 19.19 | 0.73  |
| $\nu_{\text{s}} \text{CH}_2$                | 12.55 | 11.82 | -0.73 | 11.81 | -0.74  | 9.6   | -2.95 | 11.81 | -0.74 |

## NMR Spectra

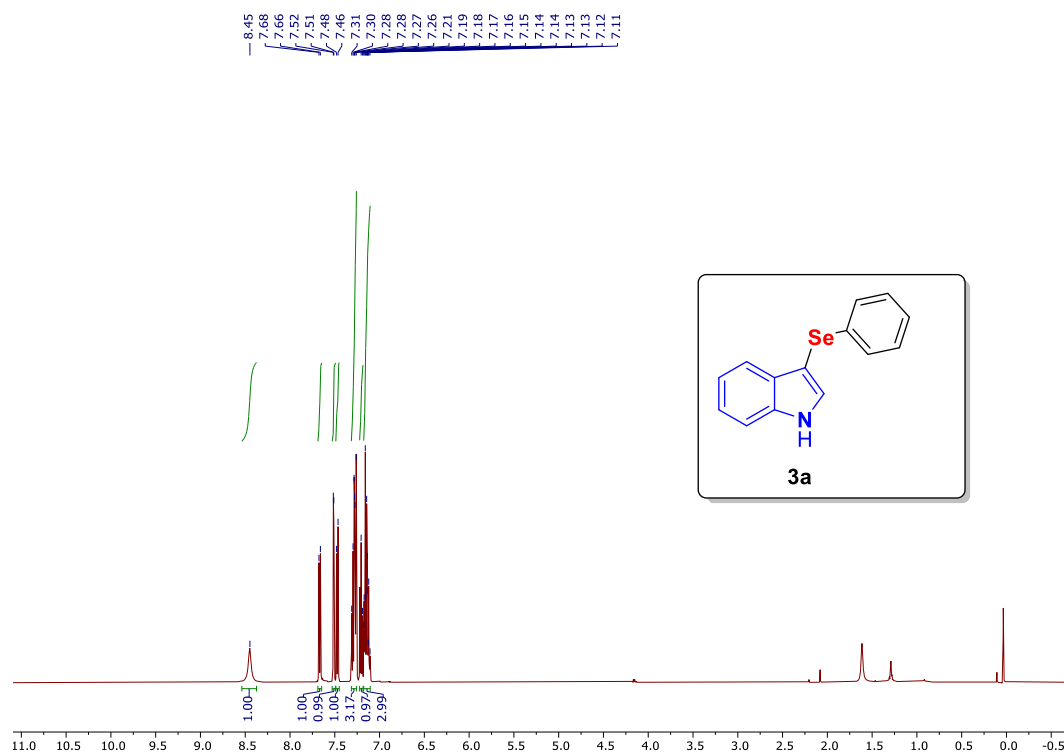

Figure ES11: <sup>1</sup>H NMR (500 MHz, CDCl<sub>3</sub>) spectrum of 3a

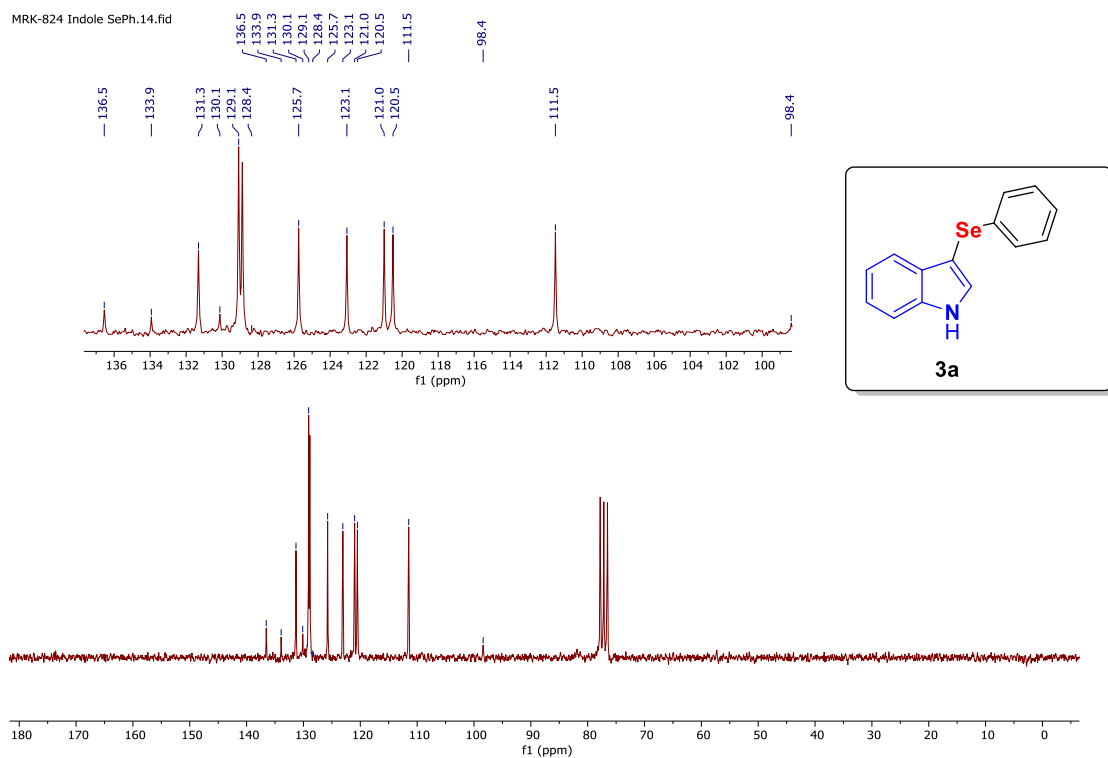

Figure ES12: <sup>13</sup>C NMR (50 MHz, CDCl<sub>3</sub>) spectrum of 3a

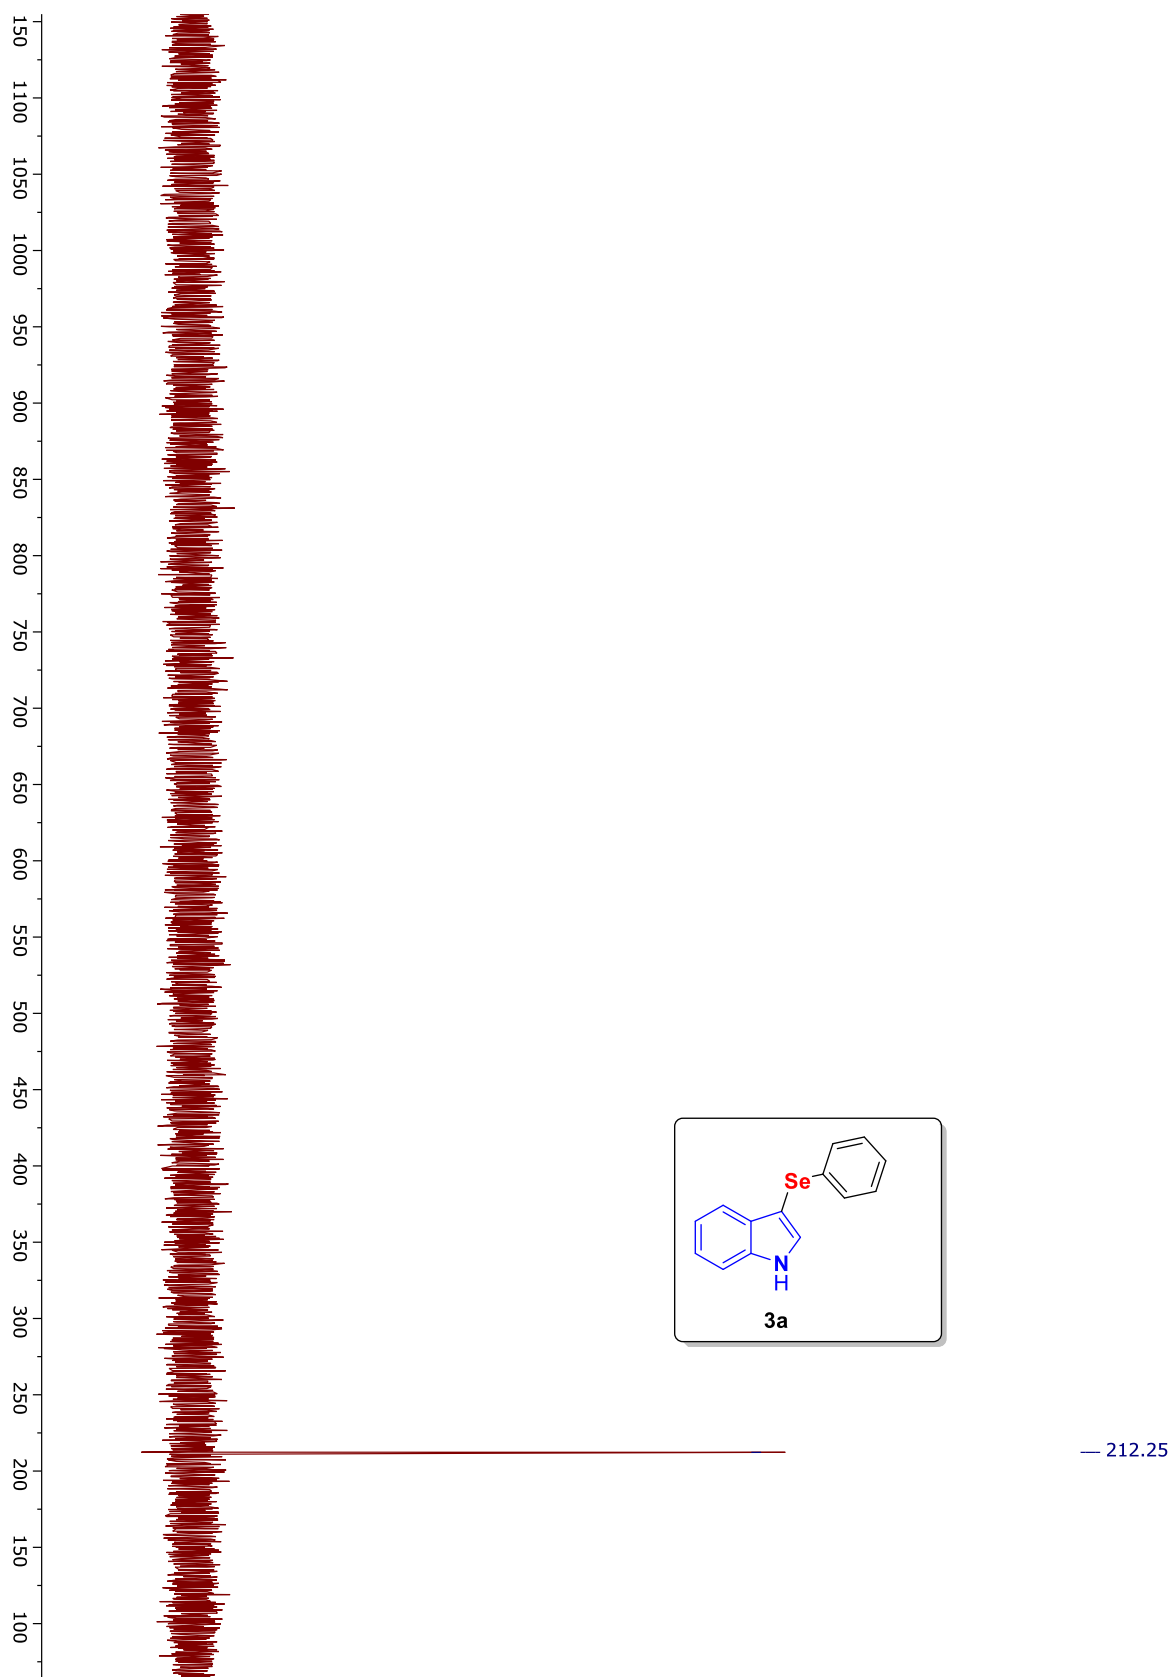

**Figure ES13:**  $^{77}\text{Se}$  NMR (95 MHz,  $\text{CDCl}_3$ ) spectrum of **3a**

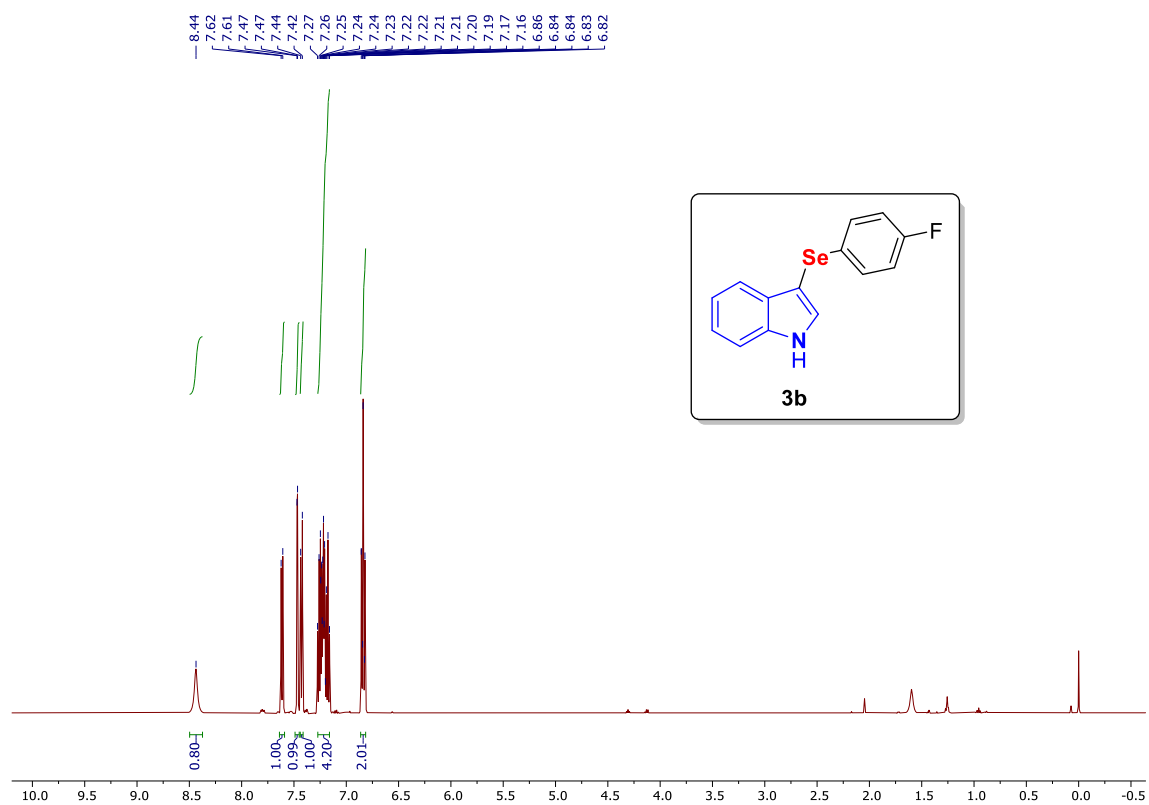

Figure ES14: <sup>1</sup>H NMR (500 MHz, CDCl<sub>3</sub>) spectrum of **3b**

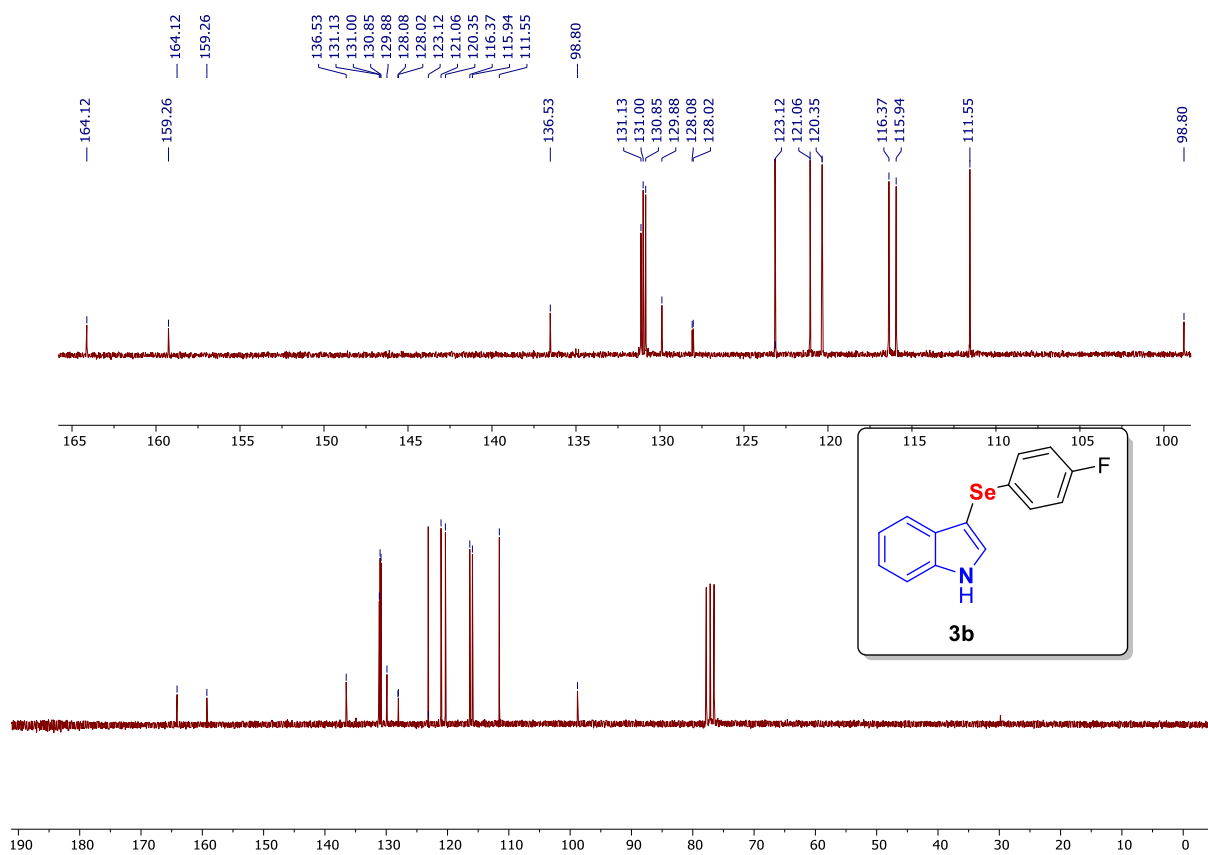

Figure ES15: <sup>13</sup>C NMR (50 MHz, CDCl<sub>3</sub>) spectrum of **3b**

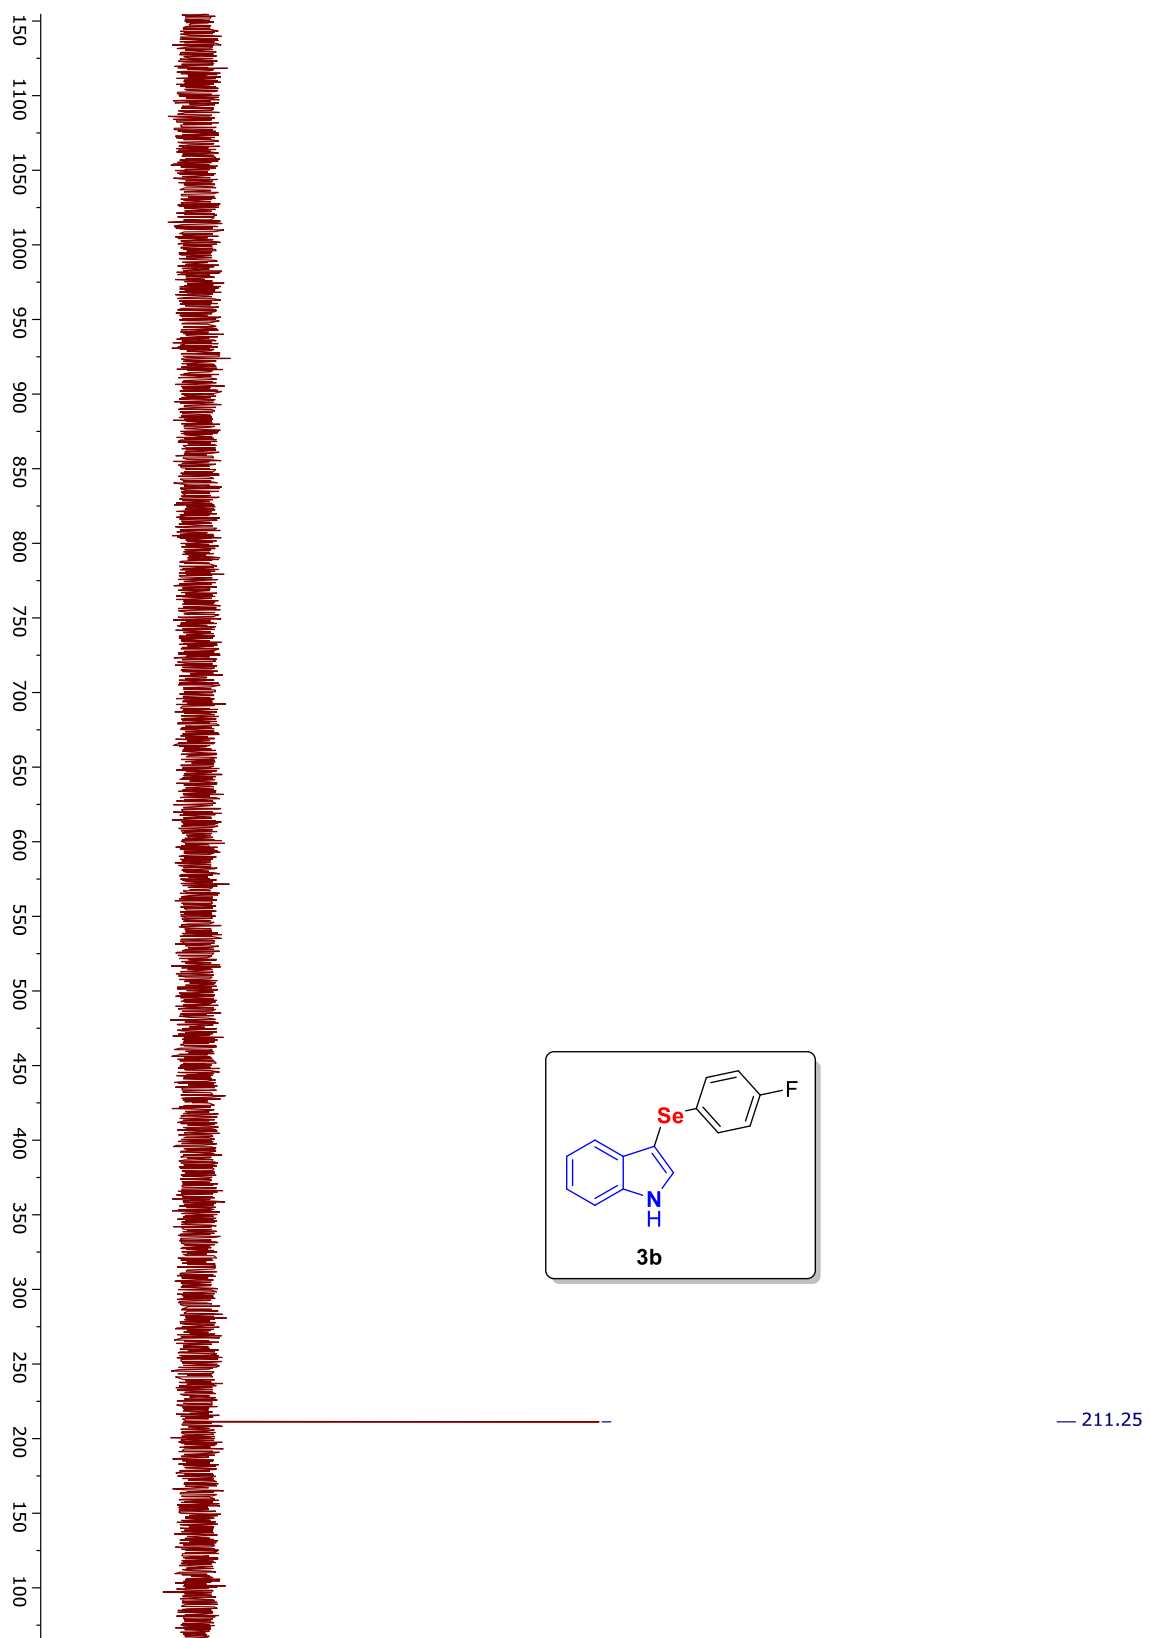

**Figure ES16:**  $^{77}\text{Se}$  NMR (95 MHz,  $\text{CDCl}_3$ ) spectrum of **3b**

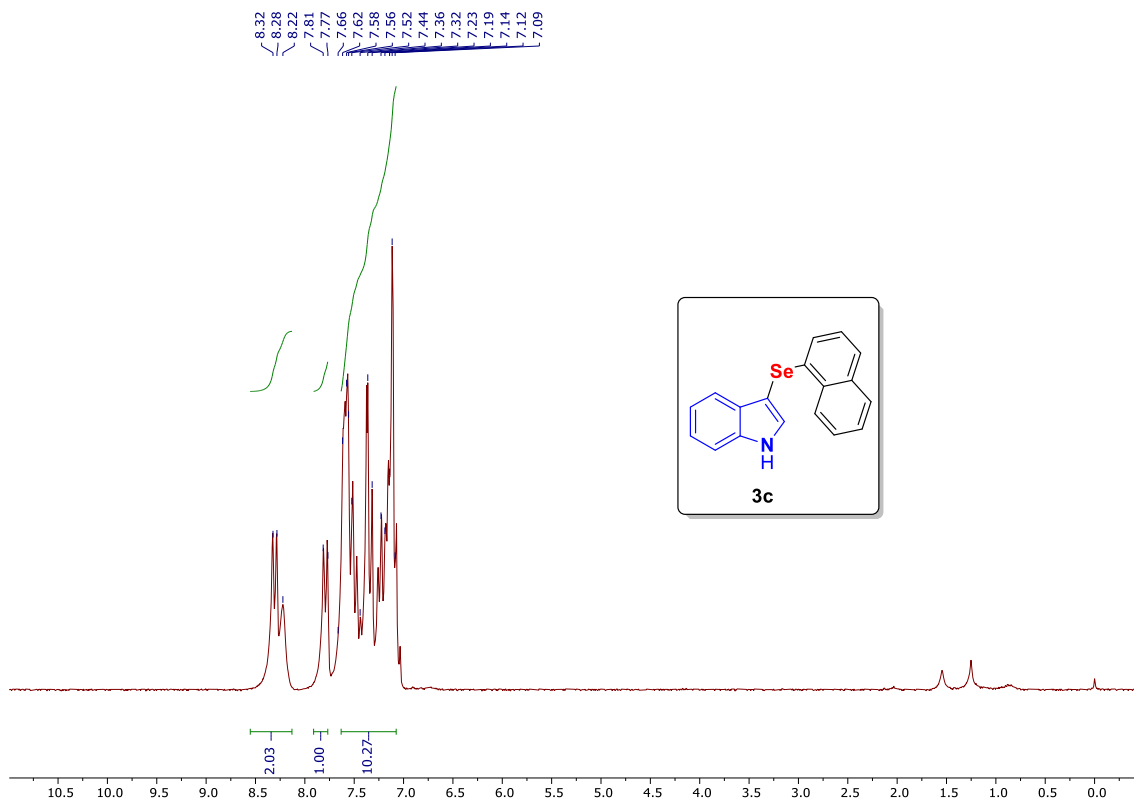

Figure ES17:  $^1\text{H}$  NMR (200 MHz,  $\text{CDCl}_3$ ) spectrum of **3c**

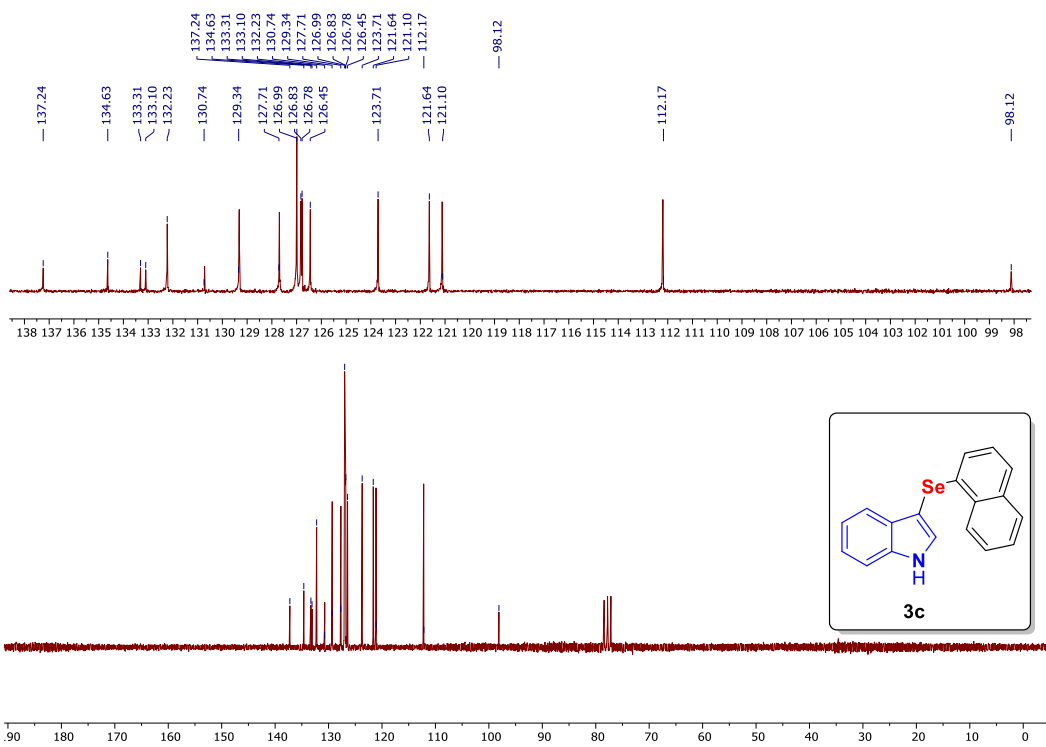

Figure ES18:  $^{13}\text{C}$  NMR (50 MHz,  $\text{CDCl}_3$ ) spectrum of **3c**

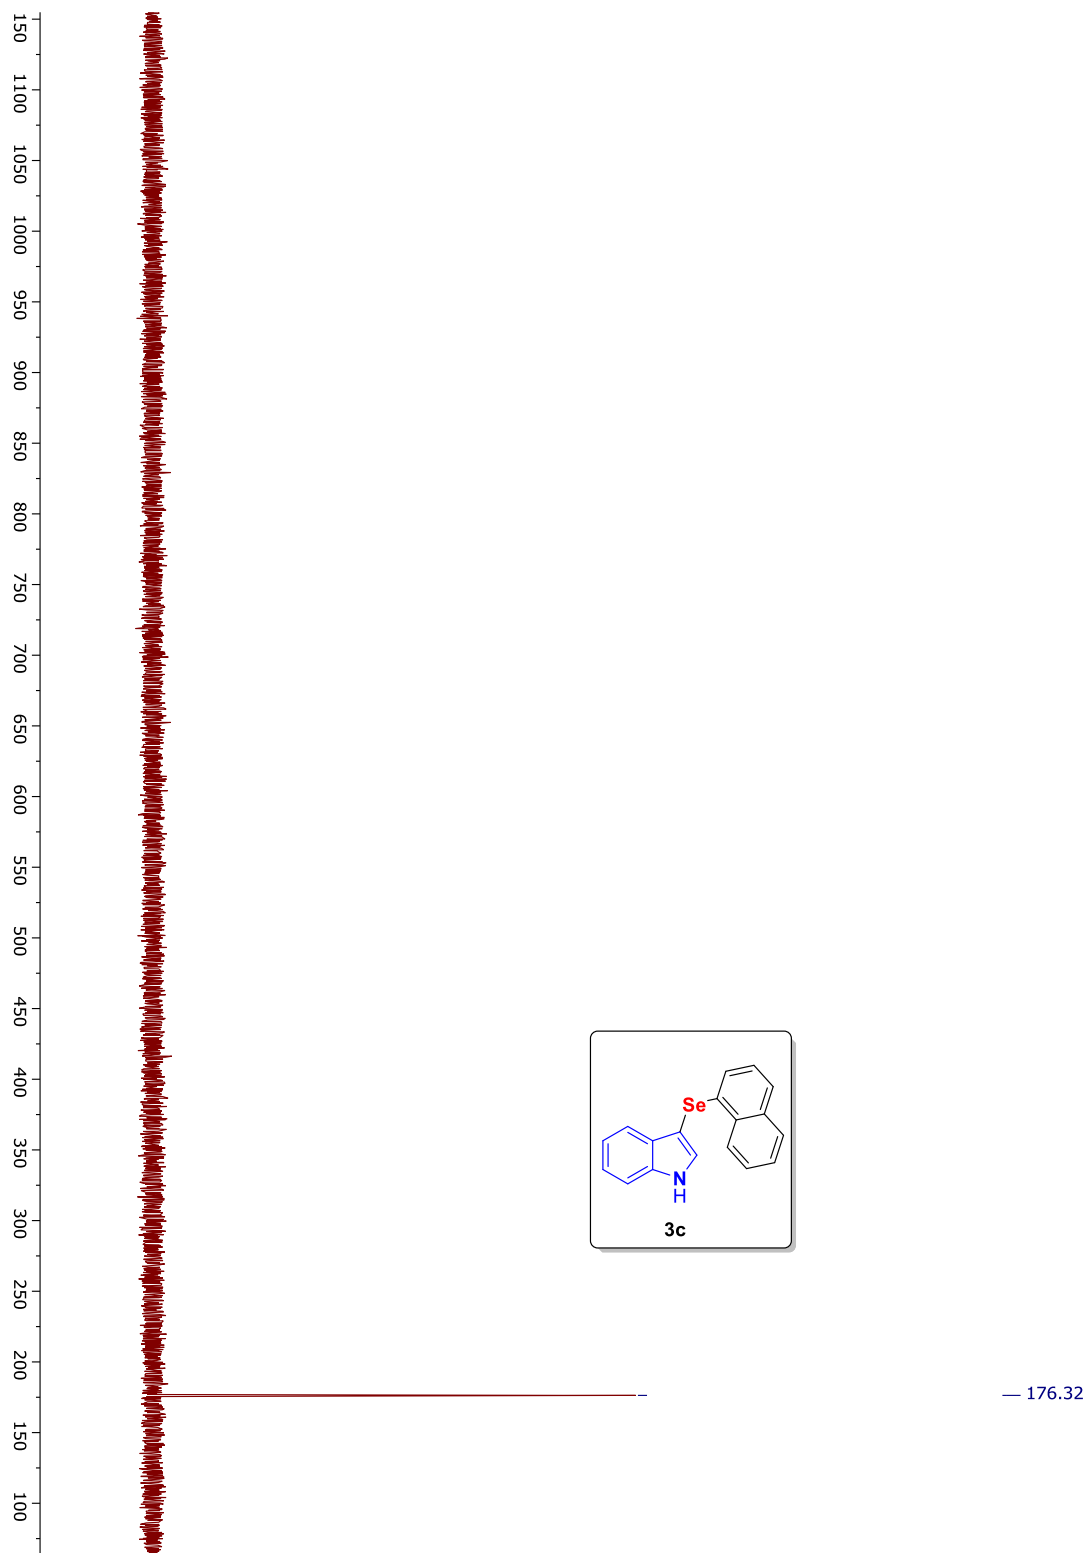

**Figure ES19:**  $^{77}\text{Se}$  NMR (95 MHz,  $\text{CDCl}_3$ ) spectrum of **3c**



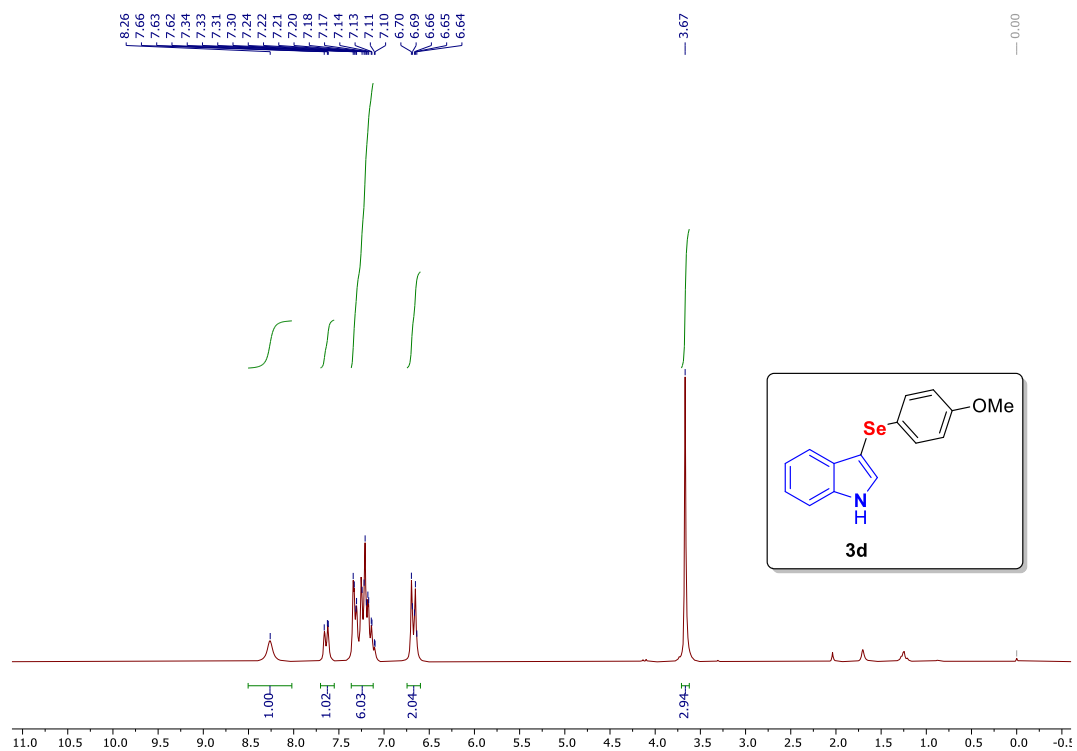

Figure ES110: <sup>1</sup>H NMR (200 MHz, CDCl<sub>3</sub>) spectrum of **3d**

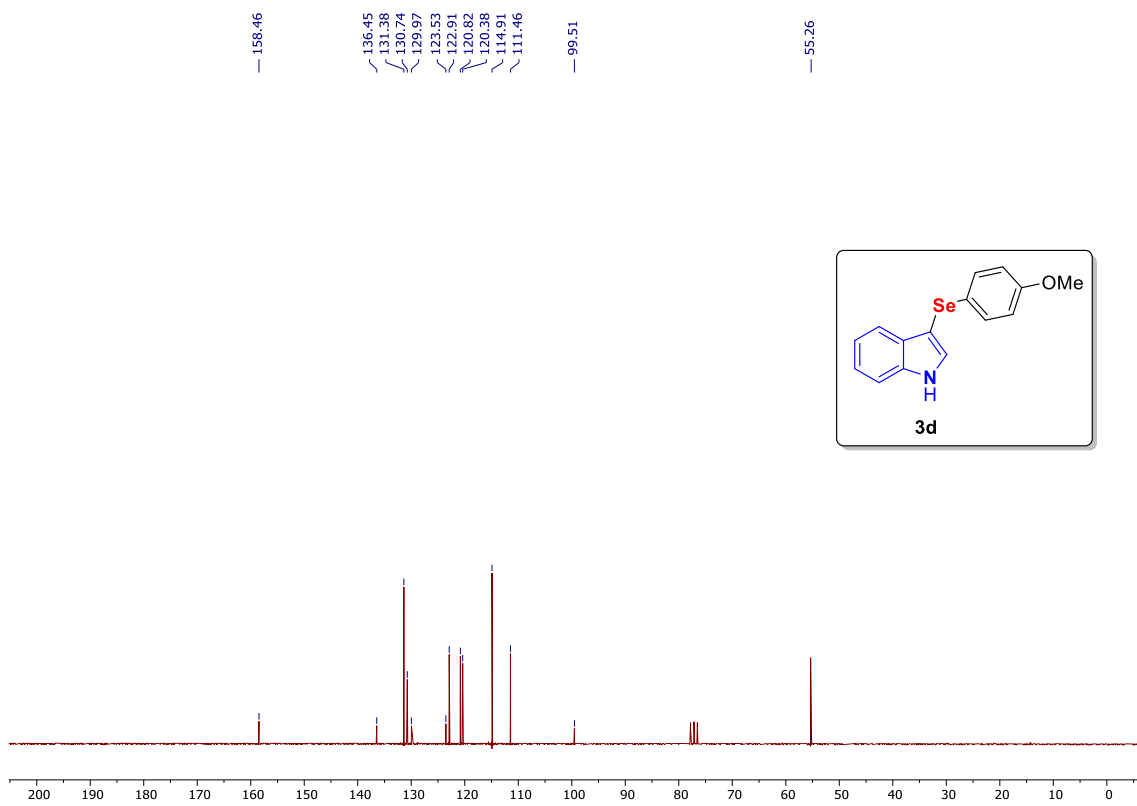

Figure ES111: <sup>13</sup>C NMR (50 MHz, CDCl<sub>3</sub>) spectrum of **3d**

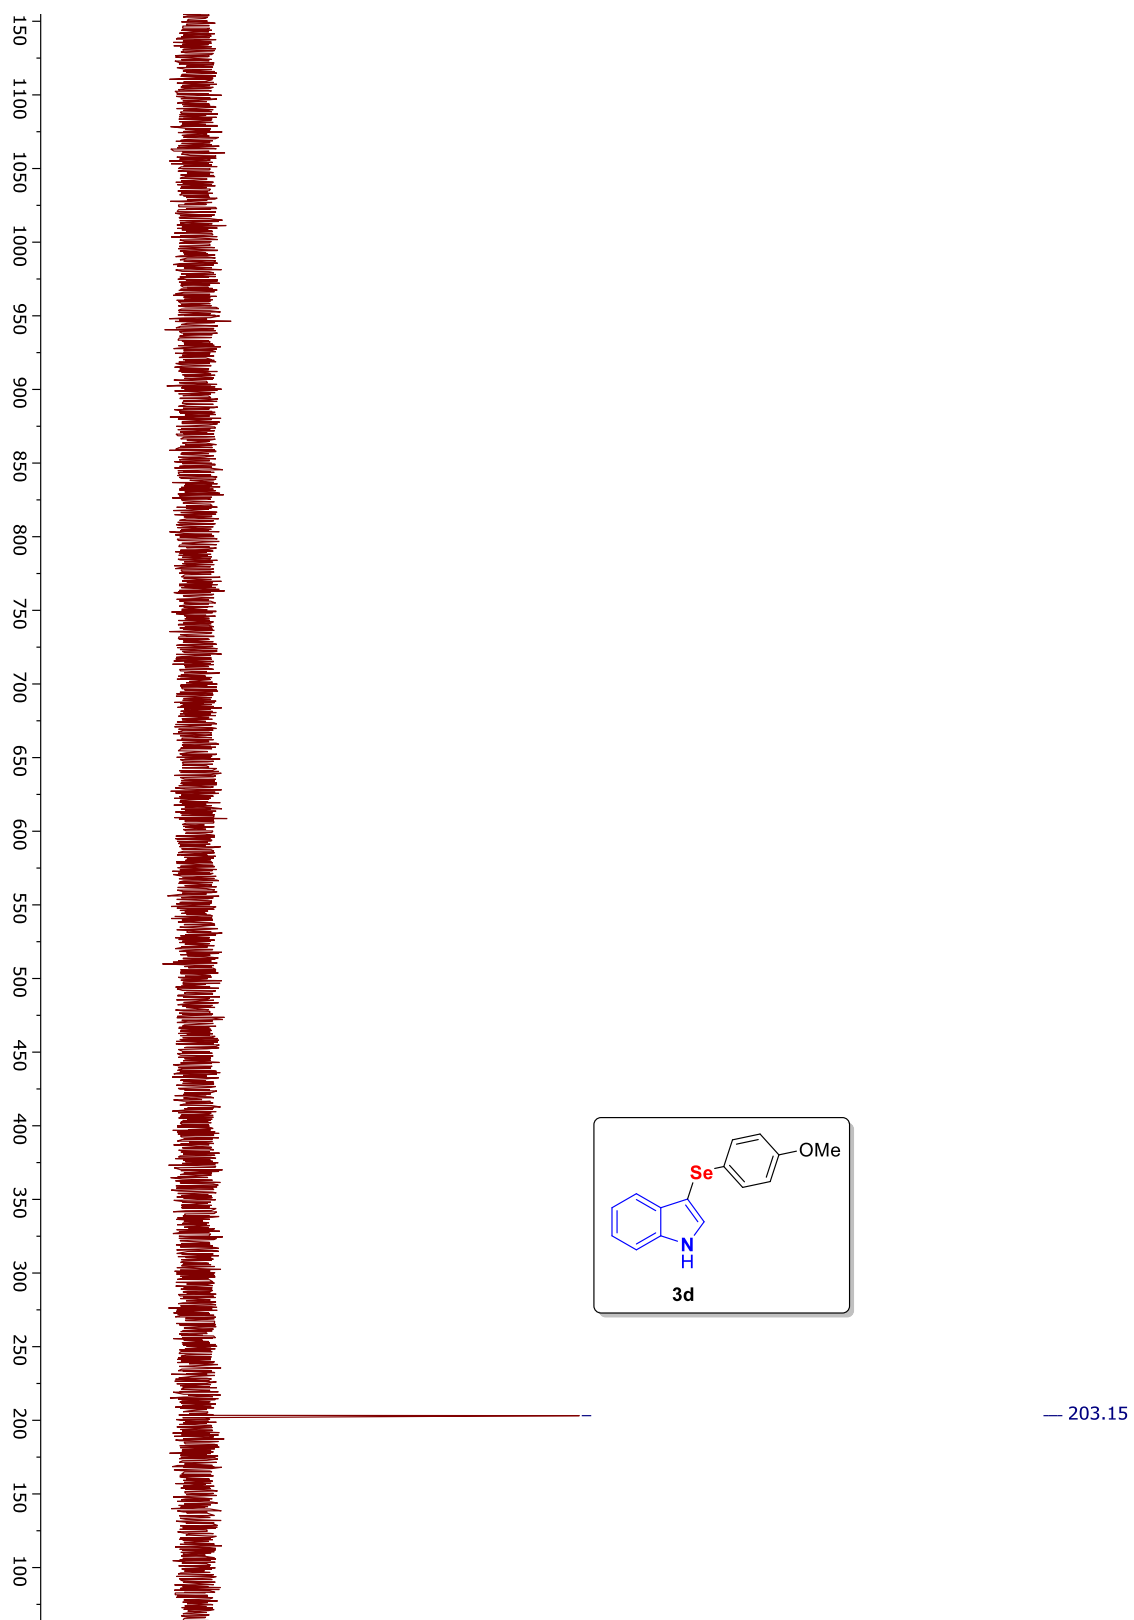

Figure ESI12:  $^{77}\text{Se}$  NMR (95 MHz,  $\text{CDCl}_3$ ) spectrum of **3d**
